# Supplementary material for: Structural basis of human ghrelin receptor signaling by ghrelin and the synthetic agonist ibutamoren
Source: Research Square preprint supplement (doi:10.21203/rs.3.rs-646701/v1), 2021-07-12
Supplement: Supplementary file 1 [file 4d14fdb6389fae345969cd14.pdf]

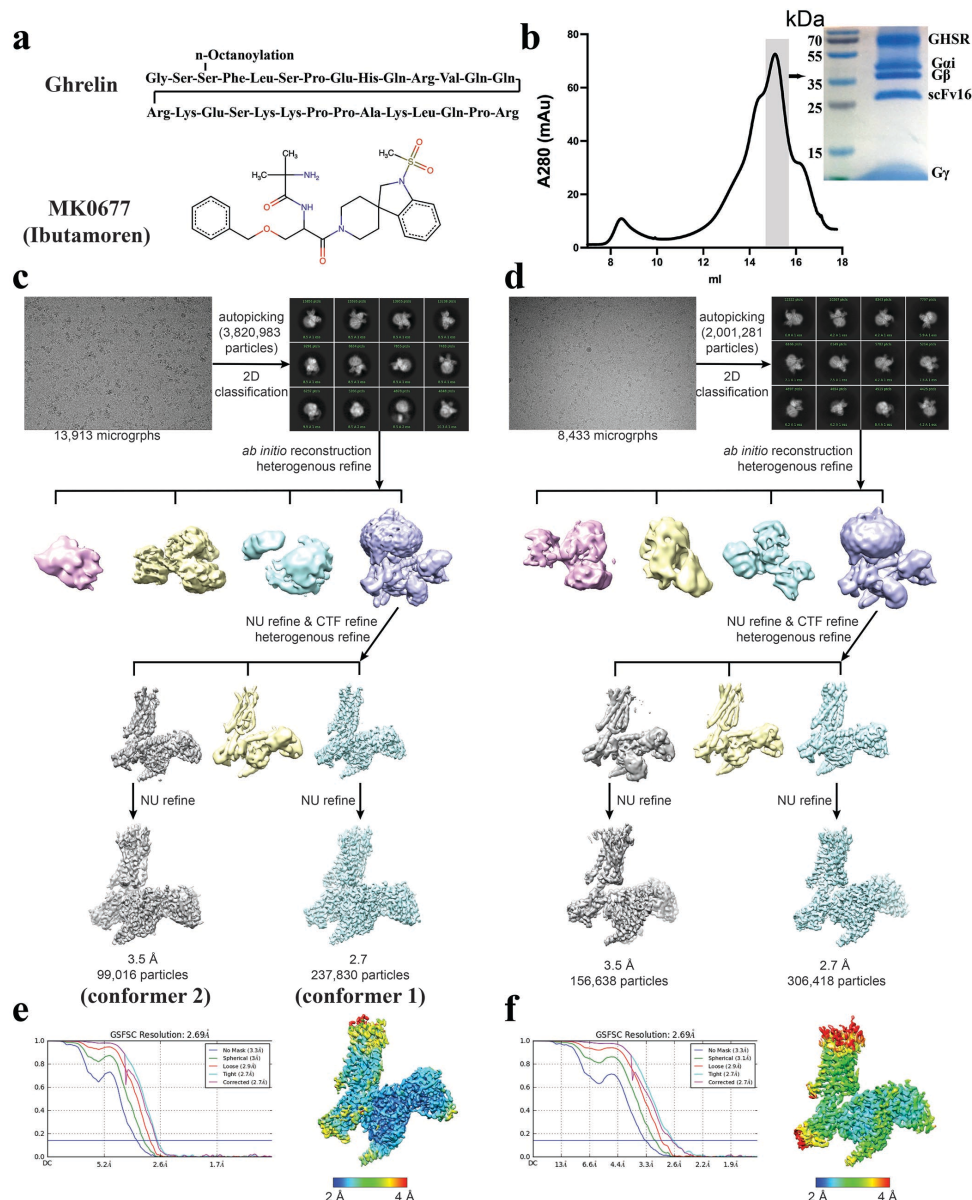

**Extended Data Figure 1. Structure determination of the GHSR-G<sub>i</sub> complexes with ghrelin and ibutamoren.** (a) Chemical structures of ghrelin and ibutamoren. (b) Size exclusion profile and SDS-PAGE analysis of the purified GHSR-G<sub>i</sub> complex with ghrelin. (c) and (d) Cryo-EM image processing workflow for the ghrelin-GHSR-G<sub>i</sub> complex (c) and the ibutamoren-GHSR-G<sub>i</sub> complex (d). (e) and (f) Fourier shell correlation (FSC) curves with the estimated resolution according to the gold standard with a mask excluding detergent micelles and local resolution estimates for the ghrelin-GHSR-G<sub>i</sub> complex (e) and the ibutamoren -GHSR-G<sub>i</sub> complex (f). In both structures, the GHSR residues from P39 to F340 except for R244-R254 in the intracellular loop 3 (ICL3) and the whole G<sub>i</sub> heterotrimer except for the  $\alpha$ -helical domain (AHD) of G<sub>αi</sub> were modeled. In the structure of GHSR with ibutamoren, the regions Y106-R107 and N188-D191 in the extracellular loops 1 and 2 (ECL1 and 2), respectively, are not modeled due to weak maps.

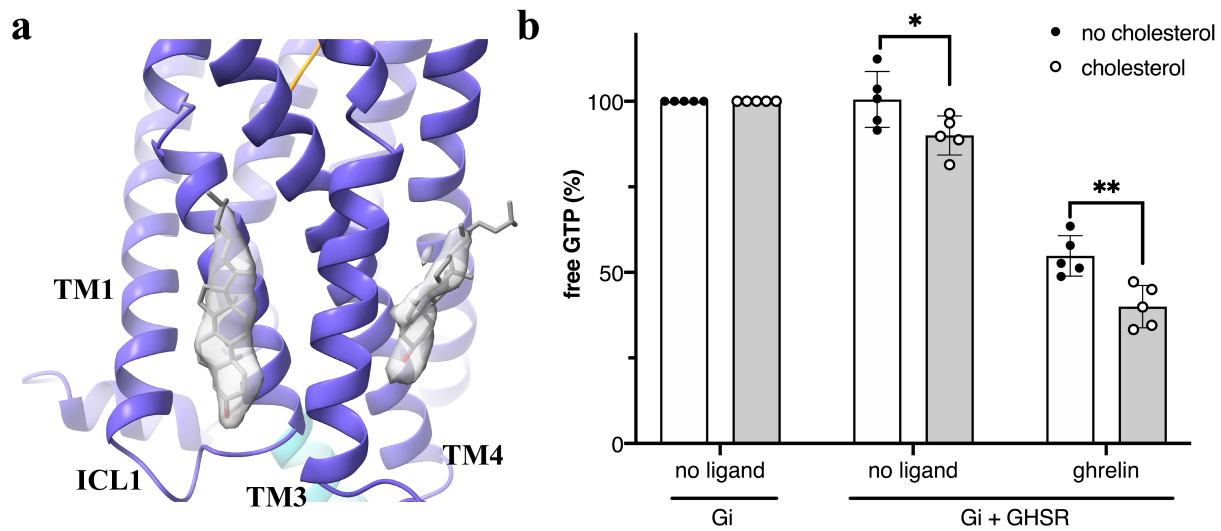

**Extended Data Figure 2. Potential cholesterol binding sites and effects of cholesterol in GHSR signaling.** **(a)** Cryo-EM density maps of two cholesterol molecules modeled in the structure of ghrelin-GHSR- $G_i$ . **(b)** GTP turnover for  $G_i$  catalyzed by wild type GHSR in nanodiscs containing 10% cholesterol (molar ratio) or not, in the absence or presence of 10  $\mu$ M ghrelin. The signal was normalized to that obtained for the G protein in the absence of receptor ( $G_i$  panels), and data is mean  $\pm$  SD of five experiments. Statistical values were obtained by means of unpaired Student's t test (\* $0.01 < p < 0.05$ , \*\* $0.001 < p < 0.01$ ). Cholesterol showed subtle but significant positive effects in enhancing GHSR-induced  $G_i$  activation both with and without ghrelin.

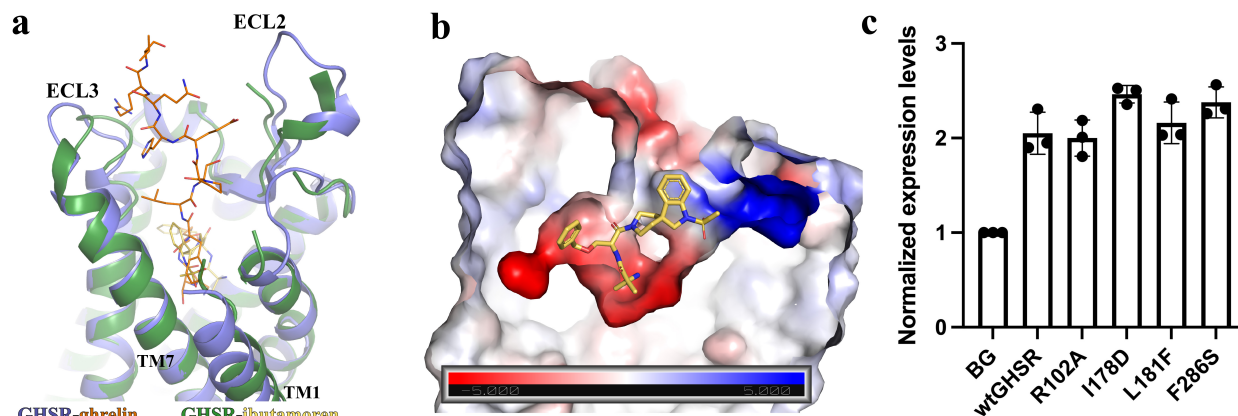

**Extended Data Figure 3. Ghrelin and ibutamoren binding pockets and expression of GHSR mutants.** **(a)** Alignment of the extracellular regions of GHSR bound to ghrelin and ibutamoren. ECL2 and ECL3 show notable conformational differences. **(b)** Charge distribution of the ibutamoren-binding pocket. **(c)** Surface expression levels of GHSR mutants. For each GHSR mutant, the expression level was determined by measuring the fluorescence intensity of transfected HEK-293 cells stained with a fluorescent anti-FLAG antibody that could bind to the N-terminal FLAG peptide of each GHSR construct. BG means background, representing results from non-transfected HEK-293 cells. Each column represents results shown as mean  $\pm$  s.d. from 3 wells of cells transiently transfected with each GHSR mutant.

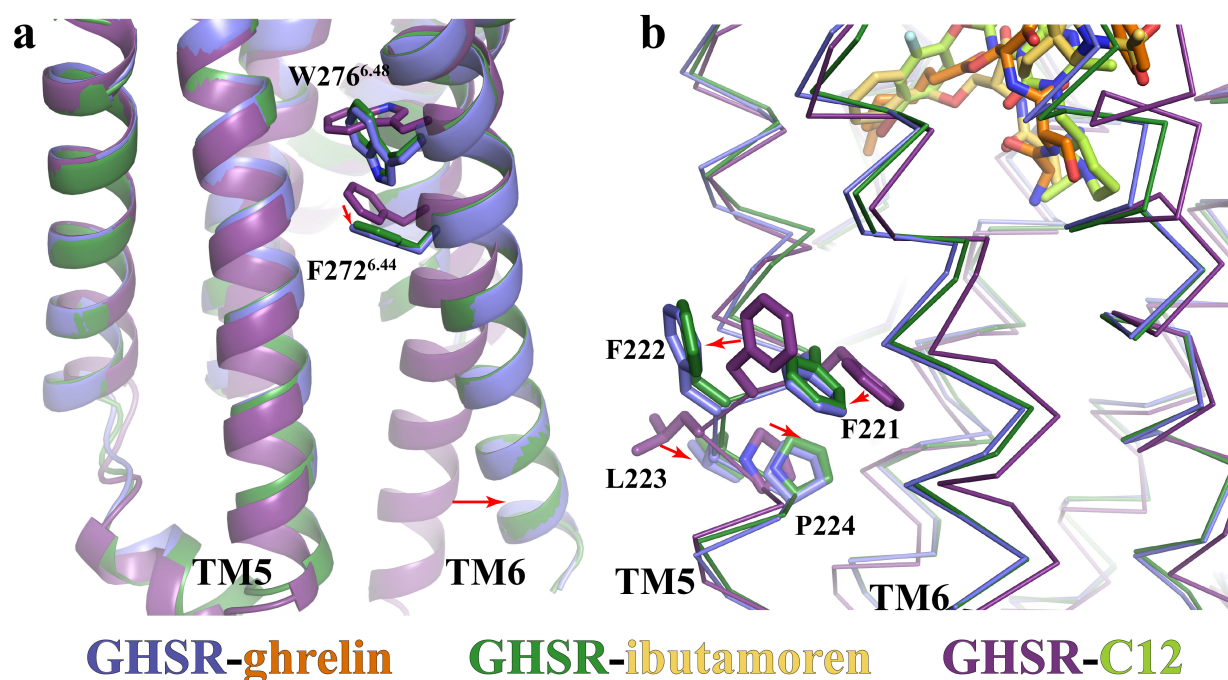

**Extended Data Figure 4. Conformational changes of residues in the core region of active GHSR bound to two agonists compared to them in the inactive GHSR bound to C12. (a)** Conformational changes of the highly conserved transmission switch F272<sup>6.44</sup> and W276<sup>6.48</sup> and accompanied conformational change of TM6. Numerous studies suggested that conformational changes of these two residues link extracellular agonist-binding events to the activation of GPCRs at cytoplasmic regions for G protein-coupling. **(b)** Conformational changes of residues in the core region of TM5. Red arrows indicate changes of residues from the inactive to the active states.

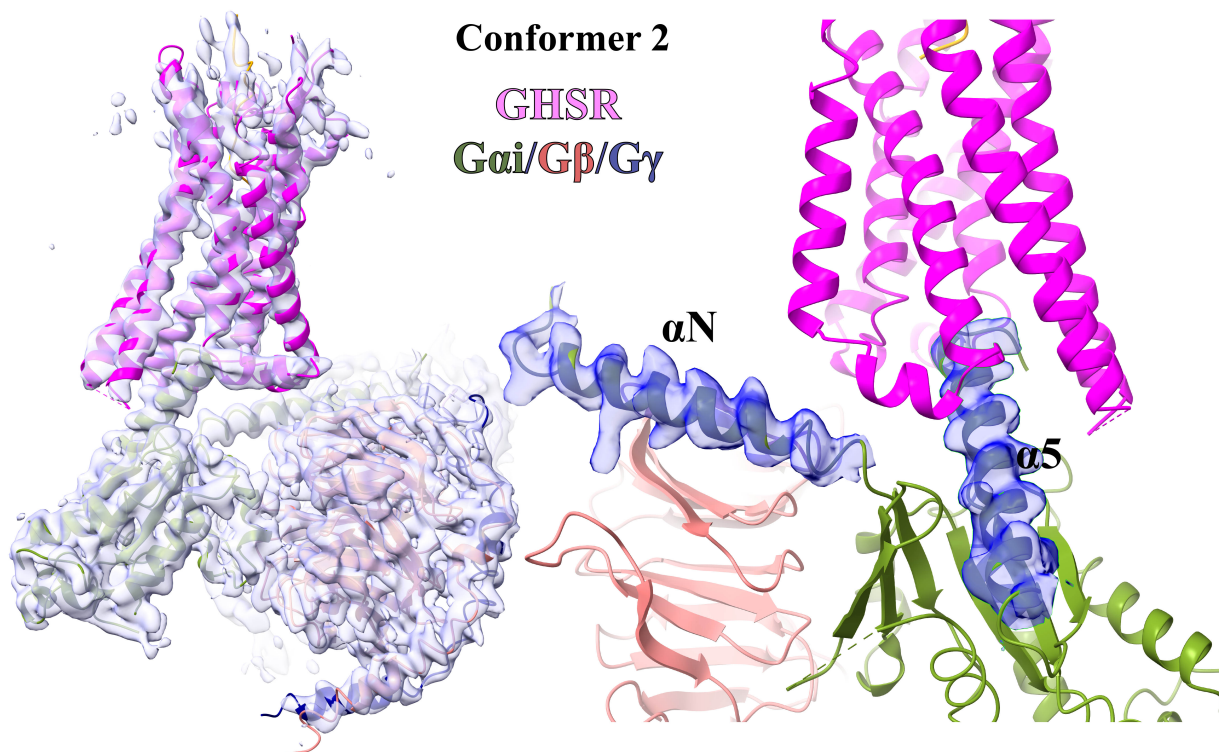

**Extended Data Figure 5. Cryo-EM density maps of the ghrelin-GHSR-G<sub>i</sub> complex in Conformer 2.** The density of the entire ghrelin-GHSR-G<sub>i</sub> complex is shown in the left panel. The density of  $\alpha$ 5 and  $\alpha$ N of G<sub>i</sub> is shown in the right panel.

**Extended Data Table 1. Cryo-EM data collection, structure refinement and statistics**

| <b>Ghrelin-GHSR-G<sub>i</sub>-scFV16</b><br>(EMD-24267, PDB 7NA7) |                             | <b>Ibutamoren-GHSR-G<sub>i</sub>-scFV16</b><br>(EMD-24268, PDB 7NA8) |
|-------------------------------------------------------------------|-----------------------------|----------------------------------------------------------------------|
| <b>Data acquisition</b>                                           |                             |                                                                      |
| Microscope/Camera                                                 | Titan Krios/Gatan K3 Camera |                                                                      |
| Voltage (kV)                                                      | 300                         |                                                                      |
| Defocus range (μM)                                                | 0.8-1.6                     | 0.8-1.6                                                              |
| Pixel size (Å)                                                    | 0.649                       | 0.826                                                                |
| Total electron dose (e <sup>-</sup> /Å <sup>2</sup> )             | 82.3                        | 81.0                                                                 |
| Exposure time (s)                                                 | 2.1                         | 3                                                                    |
| <b>Reconstruction</b>                                             |                             |                                                                      |
| Particle number                                                   | 280,046                     | 283,300                                                              |
| Resolution (masked, Å)                                            | 2.7                         | 2.7                                                                  |
| <b>RMS deviation</b>                                              |                             |                                                                      |
| Bond length (Å)                                                   | 0.006                       | 0.006                                                                |
| Bond angle (°)                                                    | 1.042                       | 0.864                                                                |
| <b>Ramachandran plot</b>                                          |                             |                                                                      |
| Favored (%)                                                       | 98.39                       | 96.91                                                                |
| Allowed (%)                                                       | 1.61                        | 3.09                                                                 |
| Outliers (%)                                                      | 0                           | 0                                                                    |
| <b>MolProbity</b>                                                 |                             |                                                                      |
| Clash score                                                       | 6.71                        | 7.77                                                                 |
| Rotamer outliers (%)                                              | 0.61                        | 0.31                                                                 |
